# Supplementary material
Source: PubMed Central journal article supplement (PMC4248460)
Supplement: supp_WNL.0000000000000999_Figure_e-1.pdf [file supp_WNL.0000000000000999_Figure_e-1.pdf]

Supplementary Figure e-1

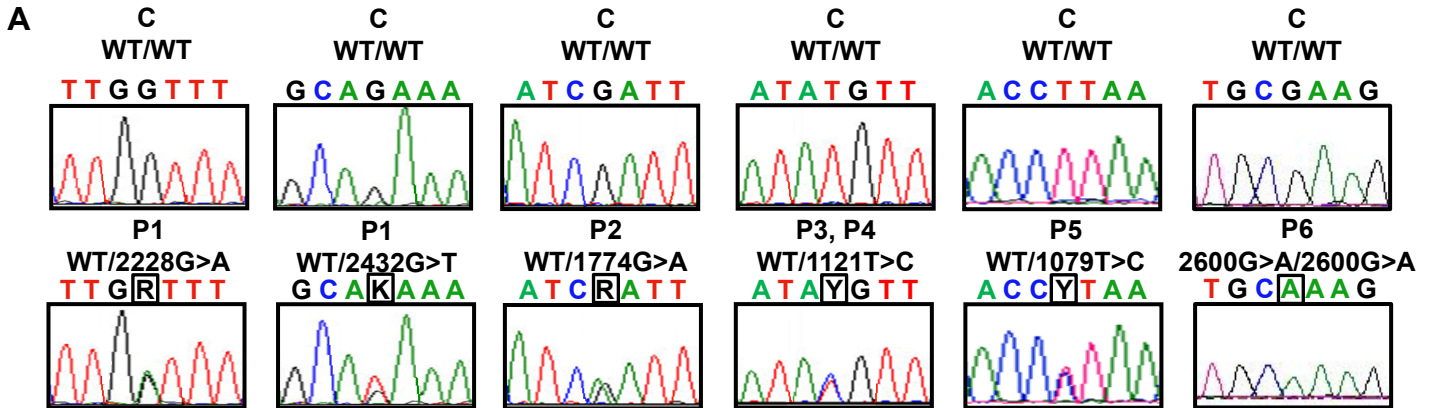

**B**

|                                | L360    | M374                | D592    | G743    | R811     | R867   |           |        |          |        |
|--------------------------------|---------|---------------------|---------|---------|----------|--------|-----------|--------|----------|--------|
| <i>Homo sapiens</i>            | KCLEHLN | MEDNDIPGIKSNMFTGLI  | .. ELKI | IDLGLNN | .. VHRVL | GFKEID | .. SIKRSR | KIIFV  | .. HALCL | RRGMFK |
| <i>Gorilla gorilla</i>         | KCLEHLN | MEDNDIPGIKSNMFTGLI  | .. ELKI | IDLGLNN | .. VHRVL | GFKEID | .. SIKRSR | KIIFV  | .. HALCL | RRGMFK |
| <i>Pan troglodytes</i>         | KCLEHLN | MEDNDIPGIKSNMFTGLI  | .. ELKI | IDLGLNN | .. VHRVL | GFKEID | .. SIKRSR | KIIFV  | .. HALCL | RRGMFK |
| <i>Macaca mulatta</i>          | TCLEHLN | MEDNDISGIKSNMFTGLI  | .. ELKI | IDLGLNN | .. VHRVL | GFKEID | .. SIKRSR | KIIFI  | .. HALCL | RRGMFK |
| <i>Felis catus</i>             | KCLEYLN | MGDNNFPGIRSNMFTGLI  | .. ELKS | IDLGLNN | .. VHRVL | GFKEID | .. SIKRSR | KTIIFV | .. HALCL | RRGMFK |
| <i>Canis lupus familiaris</i>  | KCLQYLN | MEDNYFAGIKSNMFTGLI  | .. ELKS | IDLGLNN | .. VHRIL | GFKEID | .. SIKRSR | KTIIFV | .. HALCL | RRGMFK |
| <i>Loxodonta africana</i>      | KYLEHLN | MEDNNFPGIKSNMFTGLI  | .. ELKS | IDLGLNN | .. VHRIL | GFKEID | .. SIKRSR | KTIIFV | .. HALCL | RRGMFK |
| <i>Equus caballus</i>          | KCLEYLN | MEDNNFPGIKSNMFTGLV  | .. ELKS | INLGLNN | .. VHRVL | GFKEID | .. SIKRSR | KIIFI  | .. HALCL | RRGMFK |
| <i>Bos taurus</i>              | KCLEYLN | MDDNNFPGIKRNTFTGLV  | .. ELKS | IDLGMNN | .. VHRVL | GFKEID | .. SIKRSR | KIIFV  | .. HALCL | RRGMFK |
| <i>Rattus norvegicus</i>       | KCLEHLN | MDDNTIPGIKSNFTFTGLV | .. ELKS | INLGLNN | .. VHRIL | GFKEID | .. SIKRSR | KIIFV  | .. HALCL | RRGMFK |
| <i>Mus musculus</i>            | KYLEHLN | MDDNNIPSTKSNFTFTGLV | .. ELKS | INLGLNN | .. VHRIL | GFKEID | .. SIKRSR | KIIFV  | .. HALCL | RRGMFK |
| <i>Gallus gallus</i>           | HHLEYLN | MDNNFPRITFTNMFTGLK  | .. QLKD | LDLGSNN | .. INRIL | GFKEID | .. CIRRSR | KIIFI  | .. HALCL | RRGMFK |
| <i>Pan paniscus</i>            | KCLEHLN | MEDNDIPGIKSNMFTGLI  | .. ELKI | IDLGLNN | .. VHRVL | GFKEID | .. SIKRSR | KIIFV  | .. HALCL | RRGMFK |
| <i>Pongo abelii</i>            | KSLEHLN | MEDNDIPGIKSNMFTGLI  | .. ELKI | IDLGLNN | .. VHRVL | GFKEID | .. SIKRSR | KIIFV  | .. HALCL | RRGMFK |
| <i>Pongo pygmaeus</i>          | KSLEHLN | MEDNDIPGIKSNMFTGLI  | .. ELKI | IDLGLNN | .. VHRVL | GFKEID | .. SIKRSR | KIIFV  | .. HALCL | RRGMFK |
| <i>Nomascus leucogenys</i>     | KCLEHLN | MEDNDIPGIKSNMFTGLI  | .. ELKI | IDLGLNN | .. VHRVL | GFKEID | .. SIKRSR | KIIFI  | .. HALCL | RRGMFK |
| <i>Hylobates lar</i>           | KCLEHLN | MEDNDIPGIKSNMFTGLI  | .. ELKI | IDLGLNN | .. VHRVL | GFKEID | .. SIKRSR | KIIFV  | .. HALCL | RRGMFK |
| <i>Papio anubis</i>            | TCLEHLN | MEDNDISGIKSNMFTGLI  | .. ELKI | IDLGLNN | .. VHRVL | GFREID | .. SIKRSR | KIIFI  | .. HALCL | RRGMFK |
| <i>Macaca fascicularis</i>     | TCLEHLN | MEDNDISGIKSNMFTGLI  | .. ELKI | IDLGLNN | .. VHRVL | GFKEID | .. SIKRSR | KIIFI  | .. HALCL | RRGMFK |
| <i>Cercocebus atys</i>         | TCLEHLN | MEDNDISGIKSNMFTGLI  | .. ELKI | IDLGLNN | .. VHRVL | GFKEID | .. SIKRSR | KIIFI  | .. HALCL | RRGMFK |
| <i>Saimiri boliviensis</i>     | KCLEHLN | MDDNDIPGIKSNMFTGLI  | .. ELKI | IDLGLNN | .. VHRVL | GFKEID | .. SIKRSR | KIIFV  | .. HALCL | RRGMFK |
| <i>Callithrix jacchus</i>      | KCLEHLN | MDDNDIPGIKSNMFTGLI  | .. ELKV | IDLGLNN | .. VHRVL | GFKEID | .. SIKRSR | KIIFV  | .. HALCL | RRGMFK |
| <i>Ceratotherium simum</i>     | KCLEYLN | MEDNNFPGIKSNMFTGLV  | .. ELKS | IILGLNN | .. VHRVL | GFKEID | .. SIQRSR | KIIFV  | .. HALCL | RRGMFK |
| <i>Otolemur garnettii</i>      | KRLEYLN | MEDNDIPGIKSNMFTGLI  | .. ELKS | IDLGLNN | .. VHRVL | GFKEID | .. SIKRSR | KIIFV  | .. HALCL | RRGMFK |
| <i>Cavia porcellus</i>         | KCLEYLN | MDDNNIPGIKSGMFTGLI  | .. ELKS | INLGLNN | .. VHRVL | GFKEVD | .. SIKRSR | KIVFI  | .. HALCL | RRGMFK |
| <i>Pteropus alecto</i>         | KCLEYLN | MEDNNFQGIKSNMFTGLI  | .. ELKS | ISLGLSN | .. VHRIL | GFKEID | .. SIKRSR | KIIFV  | .. HALCL | RRGMFK |
| <i>Orcinus orca</i>            | KVLEYLN | MEDNTFPGIKSNFTFTGLT | .. ELKS | IDLGLNN | .. VHRVL | GFKEID | .. SIKRSR | KIIFV  | .. HALCL | RRGMFK |
| <i>Tursiops truncatus</i>      | KFLEYLN | MEDNTFPGIKSNFTFTGLT | .. ELKS | IDLGWNN | .. VHRVL | GFKEID | .. SIKRSR | KIIFV  | .. HALCL | RRGMFK |
| <i>Rousettus leschenaultii</i> | KCLEYLN | MEDNNFQGIKSNMFTGLI  | .. ELKS | INLGLNN | .. VHRIL | GFKEID | .. SIKRSR | KIIFV  | .. HALCL | RRGMFK |
| <i>Sus scrofa</i>              | KSLEYLN | MEDNNFPGIKRNTFTGLI  | .. ELKS | IDLGLNN | .. VHRVL | GFKEID | .. SIKRSR | KIIFV  | .. HALCL | RRGMFK |
| <i>Bubalus bubalis</i>         | KCLEYLN | MEDNNFPGIKRNTFTGLV  | .. ELKS | IDLGMNN | .. VHRVL | GFKEID | .. SIKRSR | KIIFV  | .. HALCL | RRGMFK |
| <i>Capra hircus</i>            | KRLEYLN | MEDNNFPGIKRNTFTGLV  | .. ELKS | IDLGMNN | .. VHRVL | GFKEID | .. SIKRSR | KIIFV  | .. HALCL | RRGMFK |

## Supplementary Figure e-1

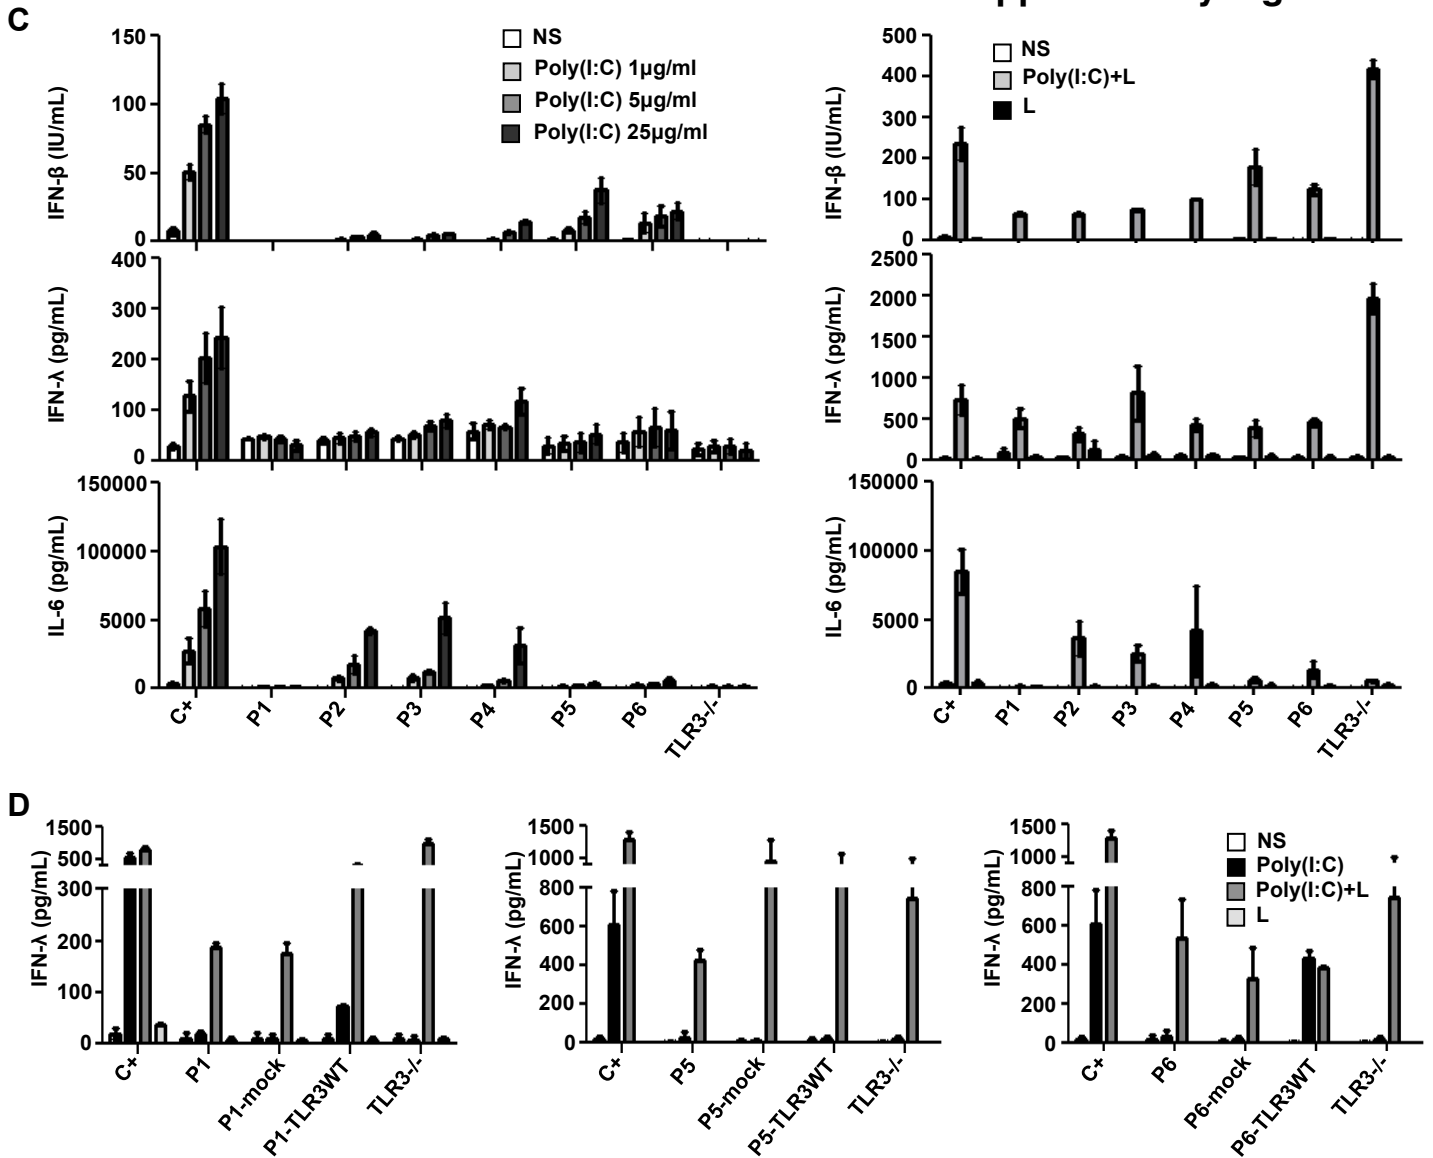

### Supplemental Figure e-1.

**(A)** Confirmation of the single nucleotide substitution for each patient. The PCR products were amplified from genomic DNA from the granulocytes and fibroblasts of a control and patients. **(B)** Multiple alignments of relevant amino-acid sequences of human TLR3, with its homologs from 32 species, with the residues mutated in P1-P6 highlighted. **(C)** Production of IFN- $\beta$ , IFN- $\lambda$  and IL-6 by SV40-fibroblasts after stimulation with 1, 5, 25  $\mu\text{g}/\text{mL}$  poly(I:C) for 24 h **(C)**, or after 24 h of stimulation with 25  $\mu\text{g}/\text{mL}$  poly(I:C) in the presence of Lipofectamine (poly(I:C)+L) or Lipofectamine alone (L), as assessed by ELISA, with cells from four healthy controls (C+), patients (P1-P6), and a TLR3 $^{-/-}$  patient. **(D)** Production of IFN- $\lambda$ , in the absence of stimulation (NS), after 24h of stimulation with 25  $\mu\text{g}/\text{mL}$  poly(I:C) in the presence of Lipofectamine (poly(I:C)+L) or without Lipofectamine (poly(I:C)), or Lipofectamine alone (L), as assessed by ELISA, in SV40-fibroblasts from patients (P1, P5, and P6) transfected with the mock construct or with HA-tagged WT *TLR3*, a healthy control (C+) and a TLR3 $^{-/-}$  patient. Mean values  $\pm$  SD were calculated from four **(C)** or three **(D)** independent experiments.
